# Supplementary material
Source: publisher figshare collection journal article supplement (https://tandf.figshare.com/articles/dataset/_/5756064)
Supplement: Supplementary file 1 [file 1]

Archive with 3 entries (3 files):
- TableS1_Primer sequences and RE PCR-RFLP_20160418.doc
- TableS2_Primer sequences PCR-HRM & sequencing_20160418.doc
- supplementaryMaterial_CM.pdf
